# Supplementary material for: Voxel-based morphometry focusing on medial temporal lobe structures has a limited capability to detect amyloid β, an Alzheimer’s disease pathology
Source: publisher site journal article supplement (doi:10.18632/aging.104012), 2020-10-05
Supplement: Supplementary file [file aging-v12i19-104012-supplementary-material-SD1.pdf]

SUPPLEMENTARY FIGURE

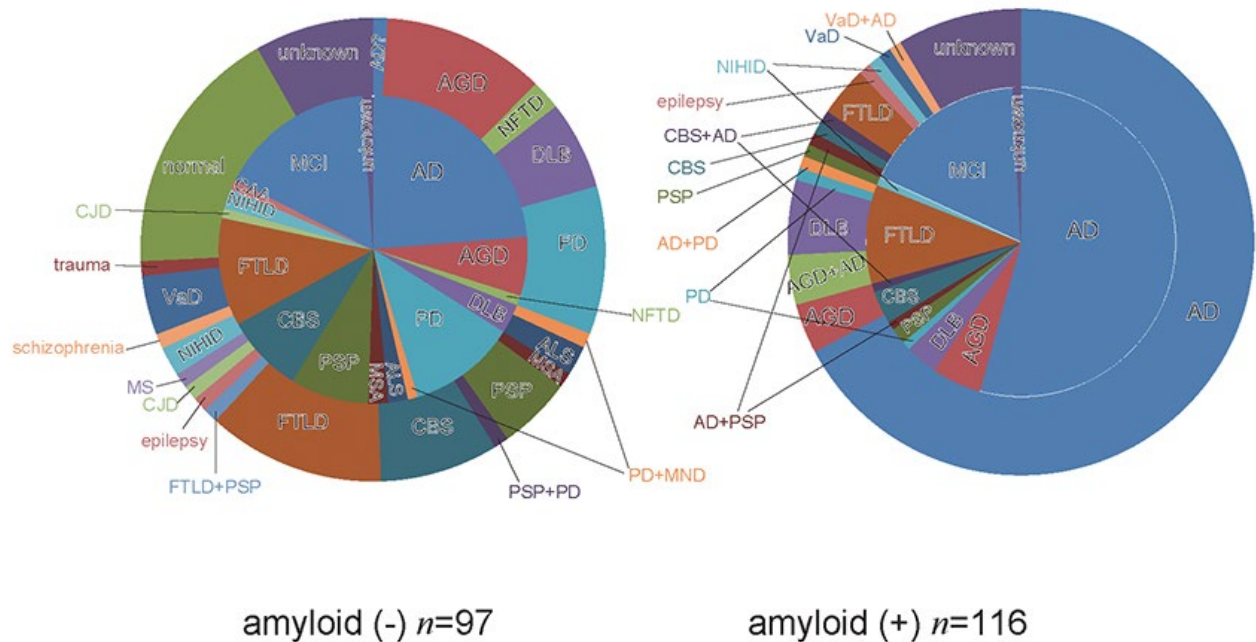

**Supplementary Figure 1. Clinical diagnosis of participants.** Inside: before amyloid PET; Outside: latest diagnosis.
